# Supplementary material for: Algorithm-driven Artifacts in median polish summarization of Microarray data
Source: Springer Nature journal article supplement (doi:10.1186/1471-2105-11-553), 2010-11-11

# Sampling of permuted ATH1 microarrays

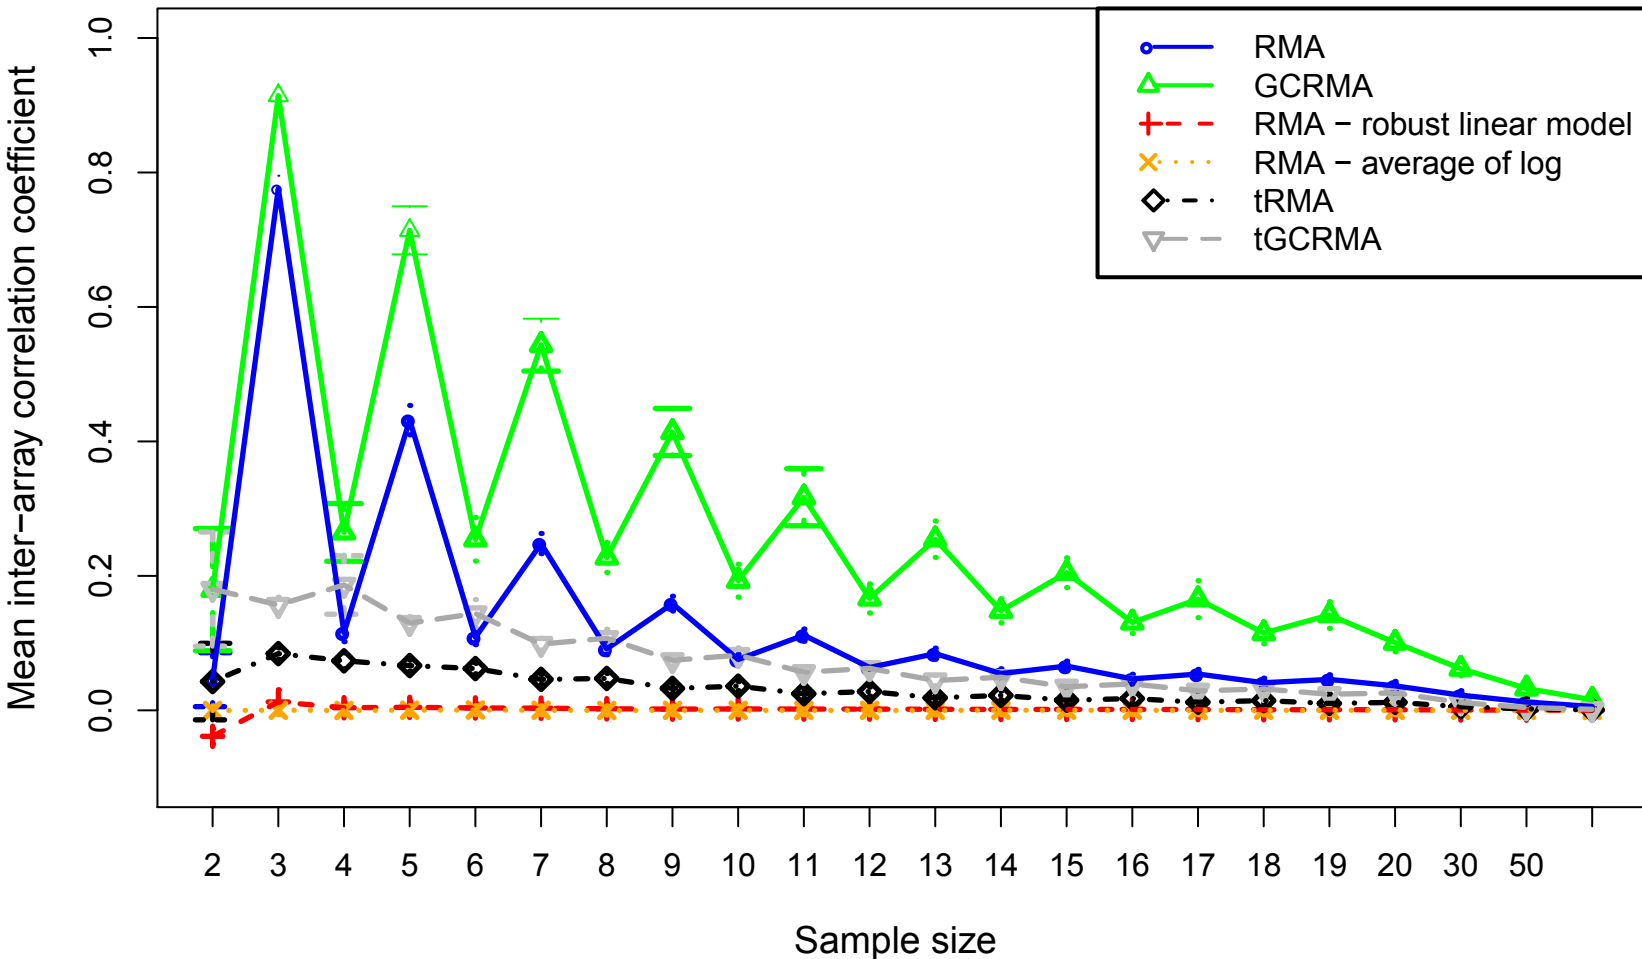

Supplement: 12859_2010_4136_MOESM22_ESM.pdf [file 12859_2010_4136_MOESM22_ESM.pdf]
